# Supplementary material
Source: PubMed Central journal article supplement (PMC2141794)

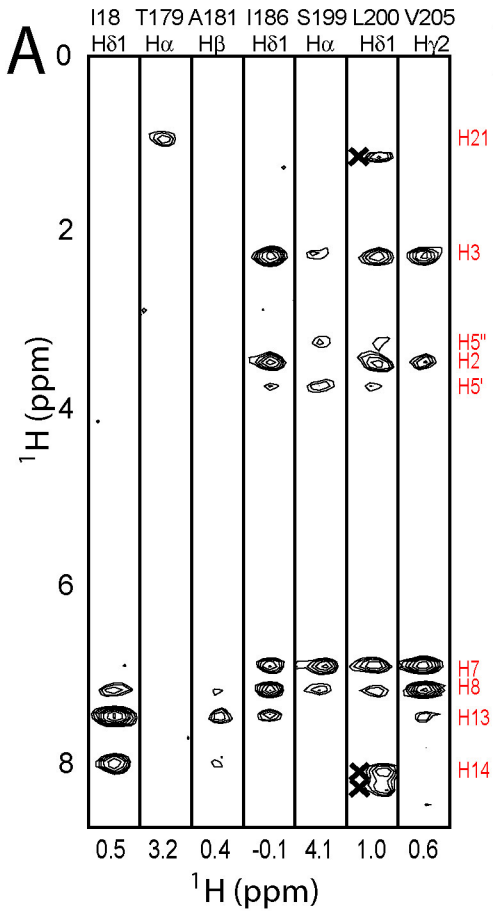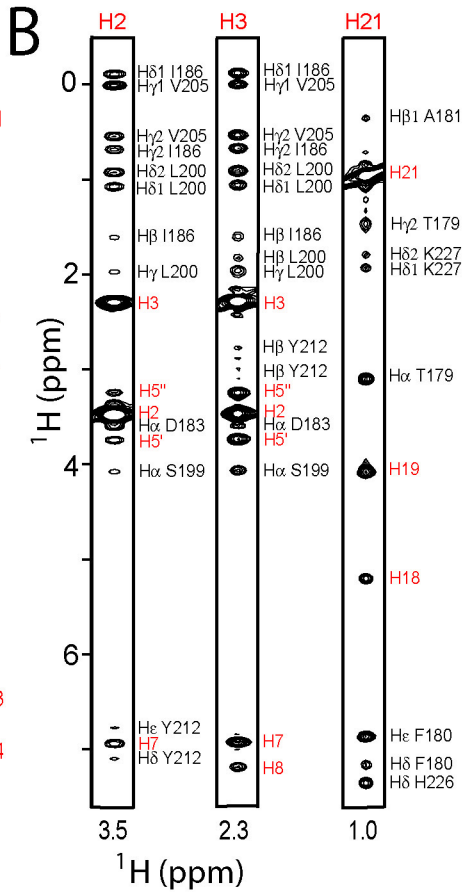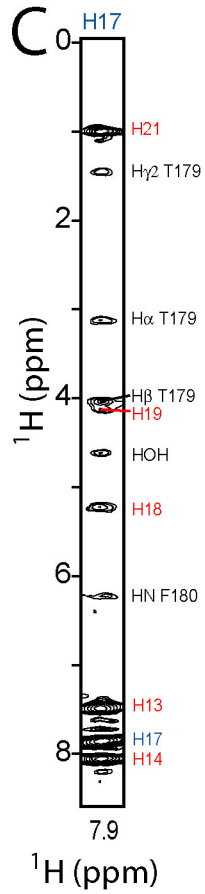

Supplement: pnas_0709412104_1.pdf [file pnas_0709412104_1.pdf]
